# Supplementary material for: Assessment of Factories on Adherence to COVID-19 Standard Operating Procedures: A Case Study of Wakiso, Mukono, Buikwe, and Jinja Districts, Uganda
Source: J Trop Med. 2024 Jan 16;2024:6670510. doi: 10.1155/2024/6670510 (PMC10805546; doi:10.1155/2024/6670510)
Supplement: Supplementary Materials — Demographic characteristics of study factories and their adherence to COVID-19 Standard Operating Procedures attributes. [file 6670510.f1.xlsx]

## Sheet: Dataset
Employer Name:	Employer Location(s):	district	Factory/Industry Type:	type of industry	Name of the person(s) completing the checklist:	GPS Reading:	_GPS Reading:_latitude	_GPS Reading:_longitude	_GPS Reading:_altitude	_GPS Reading:_precision	exposure control plan	1. Has the employer deployed a safety and health committee or other forum for frontline workers and other key stakeholders to participate in the development of the COVID-19 exposure control plans?	2. Has the employer developed a written COVID-19 Exposure Control Plan?	4. Is there anything else that you would want to note about COVID-19 Exposure Control Plan?	1. Has the employer adjusted the heating ventilation and air conditioning (HVAC) system so that it maximizes ventilation (dilution of air)?	ventilation	2. Have select doors been bypassed to decrease touching of push bars and handles, consistent with security and fire safety requirements (e.g., automatic doors or separate entrance and exit)?	3. Have workers who transport people with suspected or known COVID-19 been trained to do the following:	3a. Open windows for maximum air circulation?	3b. Set the vehicle to outside air circulation?	3c. Use PPE and respiratory protection	3. Has the employer provided communications and training on the following:	3a. Self-reporting?	3b. Safety and health protocols and control measures?	3c. Information on the virus and how it is transmitted in the work setting?	training	1. Has the employer placed signage at each entrance of the facility to inform all employees, customers, and visitors of the that they:	1a. Shall not enter the facility if they have a cough or fever?	1b. Shall maintain a minimum 2 metres distance from one another?	1c. Shall practice respiratory etiquette when inside?	2. Is all signage readable, clear, and presented in language(s) consistent with those spoken in the workplace and community? Are signage or barriers in place inside the building to help maintain 2 metres of separation?	signs	3. Has the organization established a maximum occupancy and enforceable procedure to ensure a minimum of 2 metres distance between employees, customers, and visitors?	4. Has the employer notified personnel to avoid carpooling?	5. Is there anything else that you would want to note about the Measures to Maintain Social Distancing?	social distance	4. Is there anything else that you would want to note about Engineering Controls?	1. Has the employer established a policy enabling employees perform their jobs remotely (i.e., Zoom, Google Meet, Skype Video Call, telework)?	2. Have work shifts and break times been staggered to reduce choke points (bottleneck) and congestion?	3. Has the employer erected physical barriers such as plexiglass or windows, or employed other means to separate customers and employees?	4. Is there anything else that you would want to note about Work Practices?	work pratices	1. Are handwashing facilities available to all employees with soap and running water?	2. Are alcohol-based hand sanitizers available to all employees, at entrances and exits, and field locations and regularly maintained?	3. Has the organization developed a cleaning and disinfection schedule that includes the following:	3a. A routine enhanced cleaning/disinfection schedule.	3b. Use of PPE and safe work practices to prevent chemical exposures.	3c. Availability of cleaning supplies and registered disinfectants effective against the COVID-19.	3d. Consideration of less toxic disinfectants that minimize health risks (e.g., green cleaning alternatives).
Sezibwa Sugar Uganda Farmers Crop Industries Ltd	Bunyangira, Buikwe	Buikwe	Sugar Manufacturing	food and beverages	Daniel Opima	0.3625596 32.8746521 1151.0 6.068	0.3625596	32.8746521	1151.0	6.068	NO	NO	In Progress	NO	N/A	NO	N/A		N/A	N/A	YES	YES	YES	YES	YES	YES		NO	YES	NO	NO	NO	NO	NO	NO	NO	NO	YES	YES	N/A	NO	YES	YES	YES		YES	YES	YES	YES
The Kampala Industries and Infrastructure Development Limited (TKIID LTD)	Namagunga, Kyagwe county, Buikwe District	Buikwe	Salt Production Plant	food and beverages	Daniel Opima	0.3727071 32.8919069 1144.0 6.068	0.3727071	32.8919069	1144.0	6.068	NO	NO	NO	NO	YES	YES	N/A		N/A	N/A	YES	NO	NO	NO	NO	NO		NO	YES	YES	NO	NO	YES	N/A	NO	NO	NO	N/A	YES	N/A	NO	NO	YES	YES		YES	YES	YES	YES
Yogi Steel Ltd	Malindi, Walusi Division	Buikwe	Steel Manufacturing	construction	Daniel Opima	0.4890461 33.1344659 1133.0 15.17	0.4890461	33.1344659	1133.0	15.17	YES	YES	In Progress	NO	N/A	NO	N/A		YES	YES	YES	YES	YES	YES	YES	YES		YES	YES	NO	YES	NO	In Progress	N/A	There is a challenge of slow behaviour change towards proper use of face masks, and social distancing.	NO	NO	N/A	YES	N/A	NO	NO	YES	YES		YES	YES	YES	YES
Modern Distillers Ltd	Kyagwe Block, Mbiko, Buikwe	Buikwe	Alcohol Beverage	food and beverages	Daniel Opima	0.4193565 33.160387 1195 13.653	0.4193565	33.160387	1195	13.653	YES	YES	YES	NO	N/A	NO	YES		YES	YES	YES	YES	In Progress	YES	YES	YES		In Progress	YES	YES	In Progress	YES	In Progress	N/A	NO	NO	NO	N/A	YES	YES	NO	NO	YES	YES		YES	YES	YES	YES
Gladys	Jinja	Jinja	Keshwala Group	others	Adrien	0.4325325 33.2316768 1132.0650436631981 24.05	0.4325325	33.2316768	1132.0650436631981	24.05	YES	YES	YES	No maks among employees	YES	YES	YES		YES	N/A	YES	YES	YES	YES	YES	YES		YES	YES	In Progress	YES	YES	YES	YES	2 meters signage are not displayed everywhere	YES		YES	YES	NO		YES	YES	YES		YES	YES	YES	YES
Muganga Jonah HR	Jinja	Jinja	Nilepolywood ltd/timber products	construction	Adrien	0.4303381 33.2177541 1148.9371948723667 9.29	0.4303381	33.2177541	1148.9371948723667	9.29	YES	YES	YES		YES	YES	NO		YES	N/A	YES	YES	YES	YES	YES	YES		YES	YES	NO	YES	YES	YES	YES		YES		YES	YES	N/A		YES	YES	YES		YES	YES	YES	YES
Alikoba Victoria	Jinja	Jinja	Safety Matches	others	Adrien	0.4292584 33.216539 1131.2276521602967 19.698	0.4292584	33.216539	1131.2276521602967	19.698	YES	YES	YES	Not every employee was wearing the face mask	N/A	NO	NO		In Progress	In Progress	In Progress	YES	YES	YES	YES	NO		YES	YES	YES	NO	YES	YES	YES		YES		YES	YES	NO		YES	YES	YES		YES	YES	YES	YES
KIAMBUZI	Jinja	Jinja	GEBAL MINERALS LIMITED	others	Adrien	0.4163087 33.2141669 1135.6997136025063 20.222	0.4163087	33.2141669	1135.6997136025063	20.222	NO	NO	NO		N/A	NO	N/A		N/A	N/A	YES	YES	NO	YES	YES	NO		YES	N/A	NO	NO	NO	YES	YES		YES		N/A	YES	N/A		YES	YES	YES		YES	YES	YES	In Progress
Kabanda	Jinja	Jinja	KABANDA AND SANYU GRAIN MILLER GRP	food and beverages	Adrien	0.4335367 33.2162337 1150.9465706387782 7.116	0.4335367	33.2162337	1150.9465706387782	7.116	NO	NO	NO	No mask worn at work	NO	NO	NO		NO	N/A	NO	NO	NO	NO	NO	NO		NO	NO	NO	NO	NO	NO	NO		NO		N/A	NO	NO		NO	In Progress	NO		NO	NO	NO	NO
Vijay	Jinja	Jinja	AKSHAR AGRO industries ltd	food and beverages	Adrien	0.4355403 33.2153235 1193.2516007210827 4.759	0.4355403	33.2153235	1193.2516007210827	4.759	YES	YES	YES		YES	YES	NO		NO	NO	NO	YES	NO	YES	YES	NO		NO	NO	NO	NO	NO	YES	YES		YES		N/A	YES	N/A	Only the managers were wearing Masks	YES	NO	NO		NO	NO	NO	NO
Abdallah/ Assistant Manager	Jinja	Jinja	ELIZABETH QUEEn Shoes Investment LTD	others	Adrien	0.4356242 33.219687 1159.8562876639749 4.92	0.4356242	33.219687	1159.8562876639749	4.92	YES	YES	YES		NO	NO	NO		N/A	N/A	N/A	YES	YES	YES	YES	YES		YES	YES	YES	YES	YES	NO	YES		NO		N/A	NO	N/A		NO	YES	YES		YES	YES	In Progress	In Progress
Christopher MuLumba	Jinja	Jinja	NTAKE Bakery	food and beverages	Adrien	0.420777 33.2132786 1141.2150538505746 20.0	0.420777	33.2132786	1141.2150538505746	20.0	YES	YES	YES		NO	NO	NO		N/A	N/A	YES	YES	YES	YES	YES	YES		YES	YES	YES	YES	YES	YES	YES		YES		N/A	YES	N/A		NO	YES	YES		YES	YES	YES	YES
Caroline/HR	Jinja	Jinja	HEEK INTERNATIONAL/Construction	construction	Adrien	0.4134924 33.2137482 1142.891807174273 64.1	0.4134924	33.2137482	1142.891807174273	64.1	NO	NO	NO		N/A	NO	NO		N/A	N/A	YES	YES	YES	YES	YES	YES		NO	NO	NO	NO	NO	YES	YES		YES		N/A	YES	N/A		NO	YES	YES		YES	YES	YES	YES
NUYAN	Jinja	Jinja	NAJERU PACKAGING INDUSTRY Ltd	others	Adrien	0.4320278 33.2285059 1129.6019016567705 117.448	0.4320278	33.2285059	1129.6019016567705	117.448	YES	YES	YES		YES	YES	YES		YES	YES	YES	YES	YES	YES	YES	YES		YES	YES	YES	In Progress	YES	YES	YES		YES		N/A	NO	N/A		NO	YES	YES		YES	YES	YES	YES
Gold Star Battery Uganda Limited	Naminya, Njeru Kayunga Road, Buikwe	Buikwe	Solar Battery Manufacturing	others	Daniel Opima	0.4716591 33.1457024 1128.7105055790107 19.973	0.4716591	33.1457024	1128.7105055790107	19.973	YES	YES	In Progress	NO	YES	YES	YES		NO	In Progress	In Progress	YES	YES	YES	YES	YES		YES	YES	YES	YES	YES	NO	N/A	NO	NO	NO	In Progress	YES	NO	NO	NO	YES	YES		NO	YES	YES	YES
Bavima Steel Ltd	Model Farm Road, Njeru, Buikwe	Buikwe	Steel Manufacturing	construction	Wandira Kaitaita Andrew (Mbuya Daniel)	0.4357373 33.1685025 1151.9060721328344 4.551	0.4357373	33.1685025	1151.9060721328344	4.551	YES	YES	In Progress	NO	YES	YES	YES		YES	YES	YES	YES	YES	YES	YES	YES		YES	YES	YES	YES	YES	YES	In Progress	NO	NO	NO	YES	YES	YES	NO	YES	YES	YES		YES	YES	YES	YES
Leeko Uganda Limited	Model Farm Road, Njeru, Buikwe	Buikwe	Soap, toothpaste and vaseline Manufacturing	others	Daniel Opima	0.4315644 33.1651472 1158.256898725494 21.238	0.4315644	33.1651472	1158.256898725494	21.238	NO	NO	In Progress	NO	YES	YES	YES		YES	YES	YES	YES	YES	YES	YES	YES		YES	YES	YES	YES	YES	YES	N/A	NO	NO	NO	NO	YES	YES	NO	YES	YES	YES		YES	YES	YES	YES
Kayisylivan Nutritional Services and Supplement	Namwezi, Buikwe	Buikwe	Beverage	food and beverages	Wandira Kaitaita Andrew (Mbuya Daniel)	0.4312939 33.1483512 1173.6201533512162 12.186	0.4312939	33.1483512	1173.6201533512162	12.186	NO	NO	NO	NO	NO	NO	NO		In Progress	In Progress	NO	NO	NO	NO	YES	NO		YES	YES	NO	YES	YES	YES	NO	NO	NO	NO	NO	NO	In Progress	NO	NO	YES	YES		YES	YES	NO	In Progress
Uganda Tea Cooperation Limited Kazaku Tea Estate	Namagunga, Buikwe	Buikwe	Tea factory	construction	Daniel Opima	0.3630677 32.892366 1198.440481450379 23.892	0.3630677	32.892366	1198.440481450379	23.892	YES	YES	YES	NO	NO	NO	NO		N/A	N/A	YES	YES	YES	YES	YES	YES		YES	YES	YES	YES	YES	YES	N/A	NO	NO	NO	NO	YES	NO	NO	NO	YES	YES		YES	YES	YES	YES
Tembo steel Factory	Najjembe Estate Lugazi Industrial Area, Buikwe	Buikwe	Steel Factory	construction	Daniel Opima	0.3766771 32.9070127 1118.8315134427996 102.852	0.3766771	32.9070127	1118.8315134427996	102.852	YES	YES	YES	NO	YES	YES	YES		YES	YES	YES	YES	YES	YES	YES	YES		YES	YES	YES	YES	YES	YES	N/A	NO	NO	NO	NO	YES	YES	NO	YES	YES	YES		YES	YES	YES	YES
Navin Mubiru	Kitetika	Wakiso	Construction company	construction	Navin Mubiru	0.4044339 32.5860547 1146.5132922953808 4.934	0.4044339	32.5860547	1146.5132922953808	4.934	NO	YES	YES	Presence of task force	YES	YES	YES		YES	YES	YES	YES	YES	YES	YES	YES		NO	NO	NO	YES	NO	YES	NO		NO		NO	YES	YES		YES	NO	YES		NO	YES	YES	YES
Paramboti distilleries	Seven miles Gayaza road	Wakiso	Distilleries	food and beverages	Senkungu micheal	0.4151947 32.5901942 1143.4620371309538 1700.0	0.4151947	32.5901942	1143.4620371309538	1700.0	NO	NO	NO		NO	NO	NO		YES	YES	YES	NO	NO	NO	NO	NO		NO	NO	NO	NO	NO	YES	NO		NO		NO	YES	NO		NO	YES	YES		YES	YES	YES	YES
MEC plastics	Lutete plot 431	Wakiso	Plastics recycling	plastics	Saudeeh singh	0.412252 32.5949144 1141.9525607443575 4.603	0.412252	32.5949144	1141.9525607443575	4.603	YES	YES	NO		NO	NO	YES		YES	YES	YES	YES	YES	YES	YES	YES		NO	NO	NO	NO	NO	YES	NO		NO		NO	NO	NO		NO	YES	YES		YES	YES	YES	YES
Excel industries	Komambuga	Wakiso	Plastics	plastics	Rafiki	0.4011547 32.587396 1150.840537838104 4.921	0.4011547	32.587396	1150.840537838104	4.921	NO	NO	NO		N/A	NO	YES		N/A	N/A	N/A	YES	YES	YES	YES	YES		NO	NO	NO	N/A	NO	YES	NO		NO		N/A	N/A	N/A		NO	YES	YES		NO	YES	NO	YES
Rehobuild	Lusanja	Wakiso	Manufacturing of wheelbarrows	construction	Rita Namata	0.4097432 32.5722044 1191.2136283523744 4.82	0.4097432	32.5722044	1191.2136283523744	4.82	NO	NO	NO		NO	NO	NO		NO	NO	NO	NO	NO	NO	NO	NO		NO	YES	YES	YES	YES	NO	NO		NO		NO	NO	NO		YES	NO	NO		NO	NO	NO	NO
Agri exim	Kyadondo	Wakiso	Agriculture	food and beverages	Emmanuel achopu	0.4012217 32.5787517 1148.2901527918455 5.171	0.4012217	32.5787517	1148.2901527918455	5.171	NO	NO	NO		NO	NO	YES		YES	YES	YES	YES	YES	YES	YES	YES		NO	NO	NO	NO	NO	NO	NO		NO		YES	YES	YES		NO	YES	YES		YES	YES	YES	YES
Ishaka quality commodities ltd	Mpererwe	Wakiso	Coffee and export	food and beverages	Agume abdul	0.4019833 32.5806619 1148.872382458279 5.542	0.4019833	32.5806619	1148.872382458279	5.542	NO	NO	NO		NO	NO	NO		YES	NO	NO	YES	YES	YES	YES	YES		NO	YES	NO	NO	NO	NO	NO		NO		NO	NO	NO		NO	YES	YES		YES	YES	YES	NO
Kumal	Kawanda	Wakiso	Food processing-buscuits	food and beverages	Kumal	0.3429075 32.5786107 1217.2927721587082 4.8	0.3429075	32.5786107	1217.2927721587082	4.8	NO	NO	NO		YES	YES	YES		NO	YES	YES	YES	YES	NO	YES	YES		NO	YES	YES	YES	YES	YES	NO		NO		YES	YES	NO		YES	YES	YES		YES	YES	YES	YES
Raj	Matugga	Wakiso	Distilleries	food and beverages	Raj	0.5218888 32.597148 1149.1185668247742 4.166	0.5218888	32.597148	1149.1185668247742	4.166	YES	YES	NO		YES	YES	YES		NO	NO	NO	YES	YES	YES	YES	YES		NO	YES	NO	NO	NO	YES	NO		NO		YES	YES	NO		YES	NO	YES		YES	YES	YES	NO
Mr Dorababu	Matugga katalemwa	Wakiso	Distilleries	food and beverages	Mr Dorababu	0.3429818 32.5787062 1216.6943358962442 13.851	0.3429818	32.5787062	1216.6943358962442	13.851	NO	NO	NO		YES	YES	YES		YES	YES	YES	YES	YES	YES	YES	YES		YES	YES	YES	YES	YES	YES	NO		NO		YES	YES	YES		YES	YES	YES		YES	YES	YES	NO
Medishell company	Mukono municipality	Mukono	Medical and labaratory supplies	others	Nankya R, Human resource manager	0.3313577 32.7108667 1159.567366987322 4.94	0.3313577	32.7108667	1159.567366987322	4.94	YES	NO	YES	Most our worker were encouragged to religiously follow the sops	NO	NO	NO		N/A	N/A	N/A	YES	YES	YES	YES	YES		NO	NO	NO	NO	NO	YES	YES	As a company most of our staff are field based. We have very few people in office during work hours. The engineers stay in the field servicing our machines while our sales person are told to avoid much contact with customers	YES	We don't transport people	YES	YES	YES	We work in shifts basing on a number of hours per day	YES	NO	YES		YES	YES	YES	YES
Good brotherhood ICD	Namave industrial park	Mukono	Warehouse/ inland container depot	others	Nyero	0.338447 32.6924163 1128.4643752818056 5.725	0.338447	32.6924163	1128.4643752818056	5.725	YES	YES	NO	There's no specific plan but we have security personnel to control entry and screen on entry	NO	NO	NO		NO	NO	NO	YES	YES	YES	YES	YES		NO	NO	NO	NO	NO	YES	NO	The number of staff was downsized and others are encouraged to work from home to ensure social distance for those on duty	YES	The company put in place another check point after the entrance to ensure that only those who should be on duty are the only ones going into the other sections of the warehouse	YES	YES	YES	An office which would for example house about 7 staff now allows only 2 staff per duty to reduce the risk of exposure	YES	NO	YES		YES	YES	YES	YES
YWHY Huwaye logistics	Namave industrial park	Mukono	Inland Transportation of cargo	others	David	0.3393386 32.6922668 1128.3496090962537 4.7	0.3393386	32.6922668	1128.3496090962537	4.7	NO	NO	NO		NO	NO	NO		N/A	N/A	N/A	YES	YES	YES	YES	YES		NO	NO	NO	NO	NO	YES	YES	Most of our staff esspecially offloaders are only called to work if there's an activity. All is to maintain the social distance	YES		YES	YES	NO		YES	NO	YES		YES	YES	YES	NO
Leaf tobacco and other commodities	Namave industrial park	Mukono	Secondary production	others	Christine. HR	0.3411621 32.6927075 1131.9475548619382 4.96	0.3411621	32.6927075	1131.9475548619382	4.96	YES	YES	YES	We increased the shuttle intervals to reduce on the rate of covid-19 exposure	NO	NO	NO		YES	NO	YES	YES	YES	YES	YES	YES		NO	NO	NO	NO	NO	YES	NO	We use a shuttle to transport our staff and so we can tell them to avoid carpooling. However we have increased the number of shifts for the shuttle to improve social distance within the shuttle. We reduced on the number of interns to ensure social distance in offices	YES		YES	YES	YES		YES	YES	YES		YES	YES	YES	YES
Hemian investment	Namave industrial park kkolo	Mukono	Packaging fruits	food and beverages	Mutyabya Salim Assistant Manager	0.3354361 32.7043858 1182.7577958432532 4.94	0.3354361	32.7043858	1182.7577958432532	4.94	YES	NO	NO	Most of workers stay here and are not allowed to move outside the gate to avoid exposure out in the community	NO	NO	NO		NO	NO	YES	YES	YES	YES	YES	YES		NO	NO	NO	NO	NO	NO	N/A	We keep communicating to our workers esspecially on assembly time to keep social distance	NO		NO	NO	NO		NO	NO	NO		YES	YES	YES	YES
Mariat company	Namave industrial park kkolo	Mukono	Plastic recycling	plastics	Sembusi Franko, Administrator	0.3357418 32.7017829 1181.0219229535342 4.88	0.3357418	32.7017829	1181.0219229535342	4.88	YES	NO	NO	As an administrator, I double as a security personnel and so monitor the Heath and safety for the employees	NO	NO	NO		NO	NO	NO	YES	YES	YES	YES	YES		NO	NO	NO	NO	NO	NO	NO	All the employees are housed within the warehouse and visitors are restricted and screened if she/ he must enter	NO		NO	NO	NO	Most of our work require physical presence and can't allow remote engagement	NO	NO	NO		YES	NO	YES	YES
Huasheng international ltd	Namave industrial park kkolo	Mukono	Production of plumbing materials	plastics	Arinaitwe Michael.Administrator	0.3342505 32.7042362 1184.1707048837252 4.9	0.3342505	32.7042362	1184.1707048837252	4.9	YES	YES	NO	The team leaders for all departments act as safety officers	NO	NO	NO		NO	NO	NO	YES	YES	YES	YES	YES		NO	NO	NO	NO	NO	YES	NO		NO		NO	YES	YES		YES	YES	YES		YES	YES	YES	YES
Mukwano group of companies	Namave industrial park	Mukono	Plastic production	plastics	George . General manager	0.3403367 32.7088193 1135.9285247205223 4.88	0.3403367	32.7088193	1135.9285247205223	4.88	YES	YES	YES	We have a resident Dr with a fully equipped clinic to attend to any I'll health and assess any symptomatic presentation among our workers	YES	YES	NO		YES	NO	YES	YES	YES	YES	YES	YES		YES	YES	YES	YES	YES	YES	YES	Most of the workers have residence in the near by community a walkable distance. Non of them uses public means of transport	YES	The factory has been designed to allow social distance and maintain maximum air circulation with open window areas	NO	YES	NO		YES	YES	YES		YES	YES	YES	YES
Yuti breweries	Namave industrial park	Mukono	Alcohol Production and distribution	food and beverages	Daniel. Sales coordinator	0.3303041 32.7026148 1134.017059703507 4.9	0.3303041	32.7026148	1134.017059703507	4.9	NO	NO	NO	My staff are communicated to everyday about how to protect themselves from the exposure	NO	NO	NO		N/A	N/A	N/A	YES	YES	YES	YES	YES		NO	NO	NO	NO	NO	YES	N/A	All the workers are local people and walk to and from work. No need for means of transport	YES		NO	YES	NO		NO	YES	YES		YES	YES	YES	YES
[truncated: 37 more columns]
